# Supplementary material for: Effects of dietary fiber on maternal health in pregnant women with metabolic syndrome risk: a randomized controlled trial
Source: Royal Society of Chemistry journal article supplement (doi:10.1039/d3fo05120j), 2024-01-01
Supplement: d3fo05120j1.pdf [file d3fo05120j1.pdf]

1 Table S1. Logistic regression analysis of the correlation between dietary fiber and the TG change from first trimester to third trimester in the control group.

| Variety          | Quartile         | g/day                  | TG change           |          |                     |          | TG change           |          |                     |          |
|------------------|------------------|------------------------|---------------------|----------|---------------------|----------|---------------------|----------|---------------------|----------|
|                  |                  |                        | < 25 percentile     |          | (25 - 75)           |          | >75 percentile      |          |                     |          |
|                  |                  |                        | <i>OR</i>           | <i>P</i> | <i>aOR</i>          | <i>P</i> | <i>OR</i>           | <i>P</i> | <i>aOR</i>          | <i>P</i> |
| Total fiber      | < 25 percentile  | 8.95<br>(3.13-11.28)   | 1.34<br>(0.54-3.30) | 0.530    | 1.30<br>(0.52-3.25) | 0.571    | 0.50<br>(0.19-1.33) | 0.165    | 0.51<br>(0.19-1.36) | 0.176    |
|                  | 25-75 percentile | 14.53<br>(11.39-17.97) | 1                   |          | 1                   |          | 1                   |          | 1                   |          |
|                  | >75 percentile   | 24.02<br>(>18.09)      | 1.22<br>(0.47-3.15) | 0.681    | 1.19<br>(0.46-3.09) | 0.720    | 0.63<br>(0.24-1.62) | 0.334    | 0.62<br>(0.24-1.62) | 0.332    |
| Cereal fiber     | < 25 percentile  | 1.78<br>(0.87-2.24)    | 1.72<br>(0.70-4.25) | 0.235    | 1.73<br>(0.69-4.36) | 0.243    | 1.08<br>(0.41-2.81) | 0.883    | 1.15<br>(0.43-3.06) | 0.787    |
|                  | 25-75 percentile | 3.22                   | 1                   |          | 1                   |          | 1                   |          | 1                   |          |
|                  | >75 percentile   | 6.14<br>(4.29-11.9)    | 0.70<br>(0.26-1.91) | 0.235    | 0.69<br>(0.25-1.90) | 0.474    | 0.99<br>(0.41-2.40) | 0.974    | 0.99<br>(0.41-2.43) | 0.989    |
| Vegetables fiber | < 25 percentile  | 1.95<br>(0.58-2.70)    | 0.82<br>(0.31-2.19) | 0.697    | 0.84<br>(0.32-2.24) | 0.728    | 0.80<br>(0.32-1.96) | 0.618    | 0.80<br>(0.33-1.98) | 0.636    |

|             |                  |                      |                     |       |                     |       |   |                     |       |                     |
|-------------|------------------|----------------------|---------------------|-------|---------------------|-------|---|---------------------|-------|---------------------|
|             | 25-75 percentile | 4.14<br>(2.74-6.13)  | 1                   |       | 1                   |       | 1 | 1                   | 1     |                     |
|             | >75 percentile   | 9.28<br>(6.23-21.20) | 1.69<br>(0.69-4.17) | 0.254 | 1.72<br>(0.69-4.25) | 0.243 |   | 0.80<br>(0.30-2.13) | 0.660 | 0.80<br>(0.30-2.12) |
| Fruit fiber | < 25 percentile  | 1.03<br>(0.05-1.54)  | 1.00<br>(0.40-2.49) | 0.996 | 0.98<br>(0.39-2.48) | 0.973 |   | 0.84<br>(0.32-2.21) | 0.721 | 0.86<br>(0.33-2.28) |
|             | 25-75 percentile | 2.55<br>(1.54-3.88)  |                     |       | 1                   |       | 1 |                     |       | 1                   |
|             | >75 percentile   | 5.69<br>(3.90-11.69) | 0.73<br>(0.27-2.00) | 0.545 | 0.70<br>(0.25-1.93) | 0.491 |   | 1.32<br>(0.54-3.21) | 0.541 | 1.36<br>(0.55-3.36) |
| Other fiber | < 25 percentile  | 1.14<br>(0.12-2.01)  | 1.26<br>(0.49-3.28) | 0.635 | 1.31<br>(0.50-3.43) | 0.580 |   | 1.64<br>(0.65-4.11) | 0.295 | 1.64<br>(0.65-4.14) |
|             | 25-75 percentile | 3.24<br>(2.08-4.82)  |                     |       |                     |       |   |                     |       |                     |
|             | >75 percentile   | 8.69<br>(>4.85)      | 2.52<br>(0.98-6.50) | 0.056 | 2.66<br>(1.02-6.92) | 0.046 |   | 2.90<br>(1.13-7.44) | 0.027 | 2.89<br>(1.12-7.45) |

2 TG: triglyceride. Adjusted maternal age and pre-pregnant Body Mass Index

**Table S2. Comparison of lipid profiles between GDM women in the intervention and control groups.**

| Variable |                       | <i>GDM from</i>                              | <i>GDM from</i>                         | <i>t</i> | <i>P</i> |
|----------|-----------------------|----------------------------------------------|-----------------------------------------|----------|----------|
|          |                       | <i>Intervention group</i><br>( <i>n=49</i> ) | <i>Control group</i><br>( <i>n=57</i> ) |          |          |
|          |                       | Mean±SD                                      | Mean±SD                                 |          |          |
| CHOL     | First trimester       | 4.84±0.90                                    | 4.78±0.67                               | 0.375    | 0.708    |
|          | Second trimester      | 5.79±1.03                                    | 5.80±0.89                               | -0.032   | 0.975    |
|          | Third trimester       | 6.04±0.96                                    | 6.13±0.97                               | -0.478   | 0.634    |
|          | Changes in pregnancy* | 1.23±0.78                                    | 1.30±0.91                               | -0.378   | 0.700    |
| TG       | First trimester       | 1.77±0.65                                    | 1.80±0.78                               | -0.207   | 0.837    |
|          | Second trimester      | 2.57±0.82                                    | 2.53±0.86                               | 0.255    | 0.799    |
|          | Third trimester       | 3.18±1.03                                    | 3.31±1.09                               | -0.620   | 0.536    |
|          | Changes in pregnancy* | 1.43±0.92                                    | 1.48±0.82                               | -0.286   | 0.775    |
| HDL      | First trimester       | 1.73±0.41                                    | 1.76±0.37                               | -0.605   | 0.547    |
|          | Second trimester      | 2.06±0.44                                    | 2.03±0.46                               | 0.408    | 0.684    |
|          | Third trimester       | 1.95±0.36                                    | 1.98±0.37                               | -0.375   | 0.709    |
|          | Changes in pregnancy* | 0.23±0.31                                    | 0.18±0.28                               | 0.827    | 0.410    |
| LDL      | First trimester       | 2.73±0.71                                    | 2.63±0.62                               | 0.817    | 0.416    |
|          | Second trimester      | 3.20±0.84                                    | 3.22±0.73                               | -0.089   | 0.929    |
|          | Third trimester       | 3.44±0.83                                    | 3.49±0.94                               | -0.282   | 0.779    |
|          | Changes in pregnancy* | 0.75±0.70                                    | 0.83±0.85                               | -0.553   | 0.582    |

SD: standard deviation; CHOL: cholesterol; TG: triglyceride; HDL: high-density lipoprotein; LDL: low-density lipoprotein

\* “Changes in pregnancy” was calculated as the difference between lipid levels in the third trimester and those in the first trimester

**Table S3. Comparison of blood glucose and HbA1c at different time points between the intervention and control groups using the Per-Protocol (PP) analysis.**

| variable                                 | <i>Intervention group</i> | <i>Control group</i> | <i>t</i> | <i>P</i> |
|------------------------------------------|---------------------------|----------------------|----------|----------|
|                                          | Mean±SD                   | Mean±SD              |          |          |
| Fasting blood glucose at first trimester | 4.86±0.46                 | 4.83±0.35            | 0.67     | 0.51     |
| HbA1C at first trimester                 | 5.44±0.66                 | 5.41±0.49            | 0.50     | 0.62     |
| OGTT-0H at second trimester              | 4.43±0.49                 | 4.38±0.47            | 0.95     | 0.34     |
| OGTT-1H at second trimester              | 8.57±1.77                 | 8.65±1.63            | -0.49    | 0.63     |
| OGTT-2H at second trimester              | 7.26±1.53                 | 7.28±1.48            | -0.11    | 0.91     |
| HbA1C at second trimester                | 5.14±0.35                 | 5.08±0.31            | 1.78     | 0.08     |
| Fasting blood glucose at third trimester | 4.69±0.5                  | 4.7±0.47             | -0.12    | 0.90     |
| HbA1C at third trimester                 | 5.44±0.37                 | 5.39±0.35            | 1.2      | 0.23     |

HbA1C: glycosylated hemoglobin; SD: standard deviation; OGTT: oral glucose tolerance test

**Table S4. Comparison of lipid profiles between the intervention and control groups using PP analysis.**

| Variable |                       | <i>Intervention group</i> | <i>Control group</i> | <i>t</i> | <i>P</i> |
|----------|-----------------------|---------------------------|----------------------|----------|----------|
|          |                       | Mean±SD                   | Mean±SD              |          |          |
| CHOL     | First trimester       | 4.74±0.81                 | 4.79±0.72            | -0.62    | 0.54     |
|          | Second trimester      | 5.85±0.95                 | 5.81±0.88            | 0.37     | 0.71     |
|          | Third trimester       | 6.11±1.02                 | 6.14±1.01            | -0.28    | 0.78     |
|          | Changes in pregnancy* | 1.39±0.91                 | 1.35±0.84            | 0.38     | 0.71     |
| TG       | First trimester       | 1.67±0.68                 | 1.67±0.65            | 0.07     | 0.94     |
|          | Second trimester      | 2.58±1.01                 | 2.51±0.82            | 0.67     | 0.5      |
|          | Third trimester       | 3.28±1.42                 | 3.27±1.24            | 0.05     | 0.96     |
|          | Changes in pregnancy* | 1.61±1.16                 | 1.58±0.99            | 0.21     | 0.83     |
| HDL      | First trimester       | 1.79±0.39                 | 1.82±0.35            | -1.03    | 0.31     |
|          | Second trimester      | 2.09±0.46                 | 2.06±0.42            | 0.69     | 0.49     |
|          | Third trimester       | 2.01±0.41                 | 2.01±0.42            | 0.07     | 0.94     |
|          | Changes in pregnancy* | 0.22±0.31                 | 0.19±0.32            | 1        | 0.32     |
| LDL      | First trimester       | 2.61±0.68                 | 2.63±0.63            | -0.34    | 0.73     |
|          | Second trimester      | 3.22±0.77                 | 3.23±0.78            | -0.15    | 0.88     |
|          | Third trimester       | 3.45±0.88                 | 3.49±0.98            | -0.33    | 0.74     |
|          | Changes in pregnancy* | 0.87±0.84                 | 0.86±0.84            | 0.08     | 0.93     |

SD: standard deviation; CHOL: cholesterol; TG: triglyceride; HDL: high-density lipoprotein; LDL: low-density lipoprotein

\* “Changes in pregnancy” was calculated as the difference between lipid levels in the third trimester and those in the first trimester.

**Table S5. Comparison of blood glucose and HbA1c at different time points between GDM women in the intervention and control groups using PP analysis.**

| variable                                 | <i>GDM from<br/>Intervention group</i> | <i>GDM from<br/>Control group</i> | <i>t</i> | <i>P</i> |
|------------------------------------------|----------------------------------------|-----------------------------------|----------|----------|
|                                          | Mean±SD                                | Mean±SD                           |          |          |
| Fasting blood glucose at first trimester | 5.20±0.48                              | 4.98±0.39                         | 2.520    | 0.013    |
| HbA1C at first trimester                 | 5.56±0.91                              | 5.53±0.30                         | 0.229    | 0.820    |
| OGTT-0H at second trimester              | 4.88±0.49                              | 4.70±0.50                         | 1.813    | 0.073    |
| OGTT-1H at second trimester              | 10.44±1.50                             | 10.21±1.31                        | 0.817    | 0.416    |
| OGTT-2H at second trimester              | 8.78±1.60                              | 8.65±1.52                         | 0.424    | 0.672    |
| HbA1C at second trimester                | 5.34±0.38                              | 5.18±0.33                         | 2.343    | 0.021    |
| Fasting blood glucose at third trimester | 5.00±0.53                              | 4.91±0.49                         | 0.855    | 0.395    |
| HbA1C at third trimester                 | 5.54±0.41                              | 5.47±0.38                         | 0.842    | 0.402    |

HbA1C: glycosylated hemoglobin; SD: standard deviation; OGTT: oral glucose tolerance test

**Table S6. Comparison of lipid profiles between GDM women in the intervention and control groups using PP analysis.**

| Variable |                       | <i>GDM from</i>           | <i>GDM from</i>      | <i>t</i> | <i>P</i> |
|----------|-----------------------|---------------------------|----------------------|----------|----------|
|          |                       | <i>Intervention group</i> | <i>Control group</i> |          |          |
|          |                       | Mean±SD                   | Mean±SD              |          |          |
| CHOL     | First trimester       | 4.84±0.90                 | 4.78±0.67            | 0.375    | 0.708    |
|          | Second trimester      | 5.79±1.03                 | 5.80±1.00            | -0.032   | 0.975    |
|          | Third trimester       | 6.04±0.98                 | 6.13±0.97            | -0.469   | 0.640    |
|          | Changes in pregnancy* | 1.23±0.79                 | 1.29±0.95            | -0.379   | 0.705    |
| TG       | First trimester       | 1.77±0.65                 | 1.80±0.78            | -0.207   | 0.837    |
|          | Second trimester      | 2.57±0.82                 | 2.53±0.86            | 0.255    | 0.799    |
|          | Third trimester       | 3.18±1.05                 | 3.31±1.12            | -0.622   | 0.535    |
|          | Changes in pregnancy* | 1.43±0.94                 | 1.47±0.85            | -0.269   | 0.789    |
| HDL      | First trimester       | 1.73±0.41                 | 1.76±0.37            | -0.605   | 0.547    |
|          | Second trimester      | 2.06±0.44                 | 2.03±0.46            | 0.408    | 0.684    |
|          | Third trimester       | 1.95±0.37                 | 1.98±0.38            | -0.368   | 0.714    |
|          | Changes in pregnancy* | 0.23±0.32                 | 0.18±0.30            | 0.793    | 0.429    |
| LDL      | First trimester       | 2.73±0.71                 | 2.63±0.62            | 0.817    | 0.416    |
|          | Second trimester      | 3.20±0.84                 | 3.22±0.73            | -0.089   | 0.929    |
|          | Third trimester       | 3.44±0.85                 | 3.49±0.96            | -0.272   | 0.786    |
|          | Changes in pregnancy* | 0.74±0.73                 | 0.83±0.88            | -0.551   | 0.583    |

SD: standard deviation; CHOL: cholesterol; TG: triglyceride; HDL: high-density lipoprotein; LDL: low-density lipoprotein

\* “Changes in pregnancy” was calculated as the difference between lipid levels in the third trimester and those in the first trimester
